# Supplementary material for: Exploration of the Interactions between Maltase–Glucoamylase and Its Potential Peptide Inhibitors by Molecular Dynamics Simulation
Source: MDPI journal article supplement (doi:10.3390/catal12050522), 2022-05-07
Supplement: s1 [file s1]

# Exploration of the interactions between maltase-glucoamylase and its potential peptide inhibitors by Molecular Dynamics Simulation

Shanshan Guan<sup>1,2,\*</sup>, Xu Han<sup>1</sup>, Zhan Li<sup>1</sup>, Xifei Xu<sup>1</sup>, Yongran Cui<sup>1</sup>, Zhiwen Chen<sup>1</sup>, Shuming Zhang<sup>1</sup>, Shi Chen<sup>1</sup>, Yaming Shan<sup>3</sup>, Song Wang<sup>4</sup> and Hao Li<sup>1,2,\*</sup>

<sup>1</sup> College of Biology and Food Engineering, Jilin Engineering Normal University, Changchun, Jilin 130052, China;

<sup>2</sup> Key Laboratory of Molecular Nutrition at Universities of Jilin Province, Changchun, Jilin 130052, China;

<sup>3</sup> National Engineering Laboratory for AIDS Vaccine, School of Life Sciences, Jilin University, Changchun, Jilin 130012, China;

<sup>4</sup> Institute of Theoretical Chemistry, College of Chemistry, Jilin University, Changchun, Jilin 130023, China.

Corresponding Author:

Shanshan Guan<sup>1,2,\*</sup> and Hao Li<sup>1,2,\*</sup>

Street Address, No.3050 Kaixuan Road, Changchun City, China. Zip Code: 130052

Email address: guanshanshan@jlenu.edu.cn; lihao@jlenu.edu.cn ;

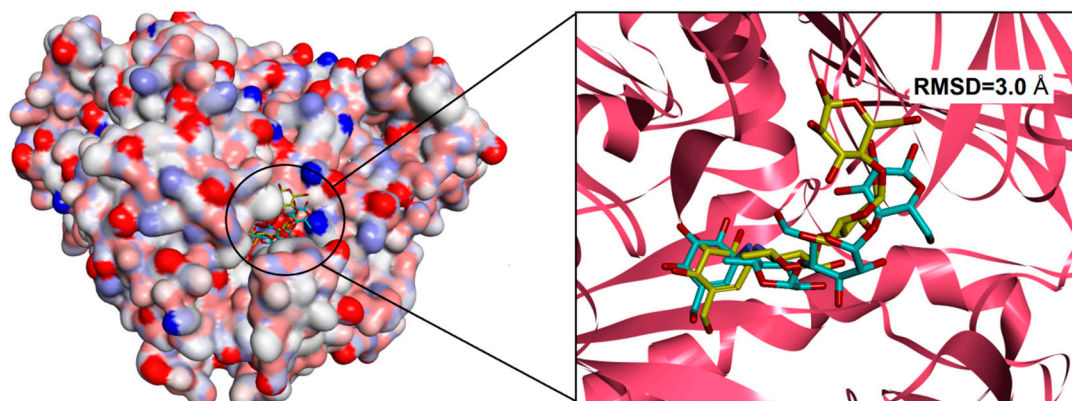

**Figure S1** The comparison between the re-docked acarbose (blue) and the reference for the crystal structure (yellow).

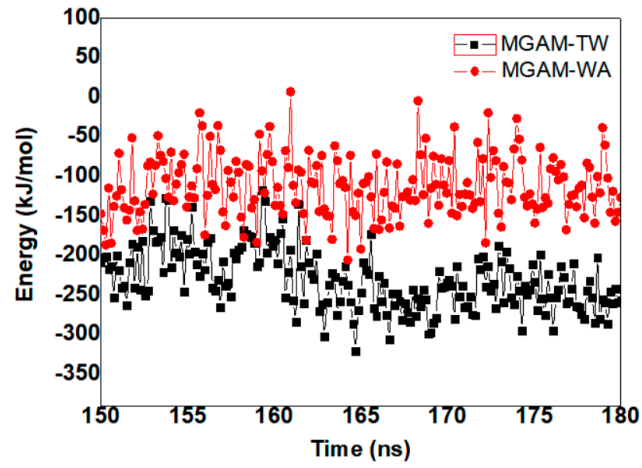

Figure S2. The binding energy distribution of MGAM-TW and MGAM-WA.

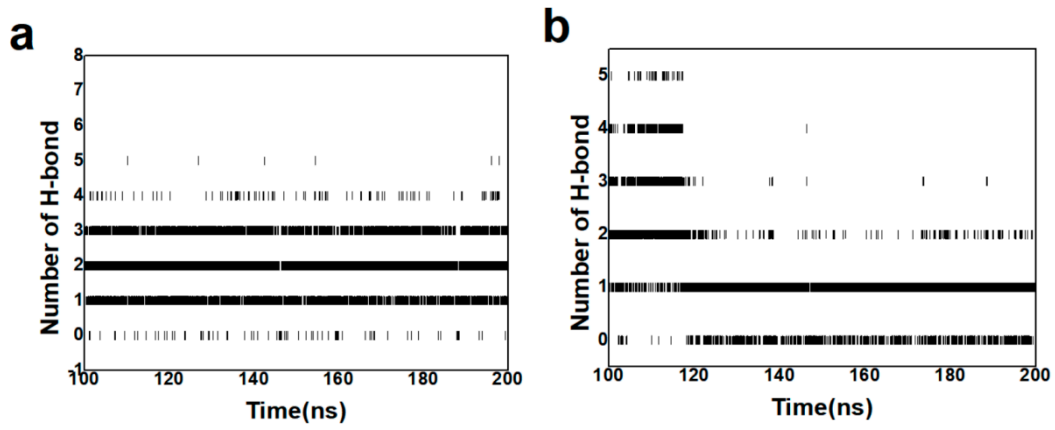

Figure S3 The number of H-bonds evolution along time (a) MGAM-TW (b) MGAM-WA.

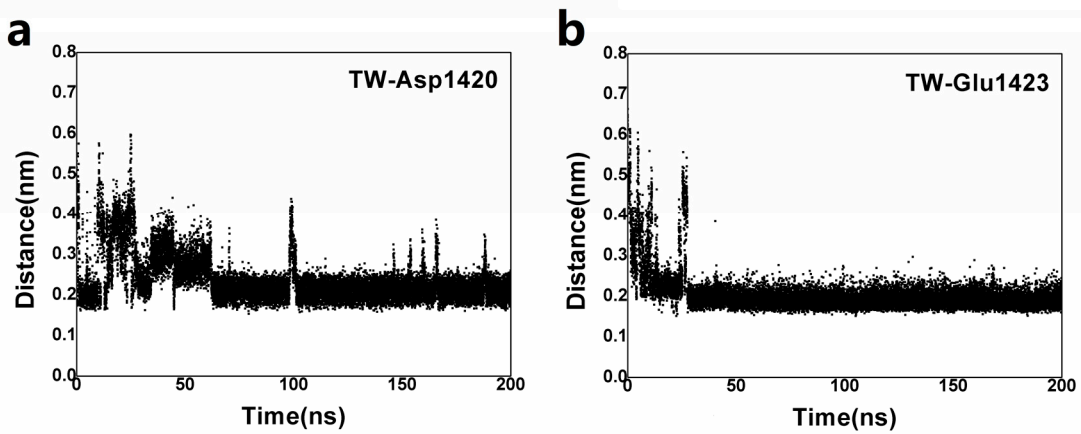

Figure S4. The distances between TW and Asp1420/Glu1423 in MGAM-TW complex.

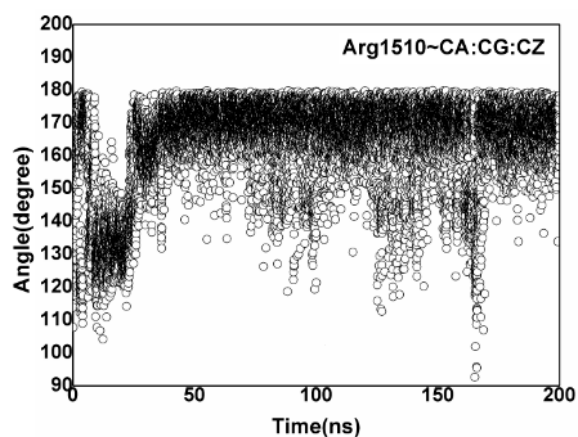

**Figure S5** The angle deflection of Arg1510 side chain during the simulations in MGAM-TW complex.

**Table S1.** The cluster size of WA in cluster 7 to cluster 12.

| Cluster | 7  | 8  | 9 | 10 | 11 | 12 |
|---------|----|----|---|----|----|----|
| size    | 58 | 14 | 9 | 6  | 2  | 2  |

**Table S2** The probability of H-bonds in the MGAM-TW complex.

| Acceptor     |      | Donor                    |                   | Presence (%) |
|--------------|------|--------------------------|-------------------|--------------|
| MGAM-Asp1420 | C=O  | MGAM-Thr1 <sup>pep</sup> | NH (amino group)  | 82.25%       |
| MGAM-Glu1423 | COO- | MGAM-Trp2 <sup>pep</sup> | NH (indole group) | 95.21%       |

**Table S3.** Molecular systems.

| Simulations       | MGAM-TW complex          | MGAM-WA complex          |
|-------------------|--------------------------|--------------------------|
| Force field       | Gromos 54 A7 force field | Gromos 54 A7 force field |
| Time (ns)         | 200                      | 200                      |
| Number of solvent | 41895                    | 41908                    |
| Number of ions    | 28 NA+                   | 28 NA+                   |
