# Supplementary material for: Exploration of the Interactions between Maltase–Glucoamylase and Its Potential Peptide Inhibitors by Molecular Dynamics Simulation
Source: MDPI journal article supplement (doi:10.3390/catal12050522), 2022-05-07
Supplement: s1 [file s1]

Archive with 1 entries (1 files):
- catalysts-1681185-supplementary.pdf
